# Supplementary material for: Magnetic structures of Fe32+δGe33As2 and Fe32+δ′Ge35−xPx intermetallic compounds: a neutron diffraction and 57Fe Mössbauer spectroscopy study
Source: Royal Society of Chemistry journal article supplement (doi:10.1039/d0dt03923c), 2021-01-01
Supplement: d0dt03923c1.pdf [file d0dt03923c1.pdf]

**Electronic Supporting Information for the manuscript**

***Magnetic Structures of  $Fe_{32+\delta}Ge_{33}As_2$  and  $Fe_{32+\delta}Ge_{35-x}P_x$  Intermetallic Compounds: A Neutron Diffraction and  $^{57}Fe$  Mössbauer Spectroscopy Study***

Roman A. Khalaniya,<sup>\*a</sup> Alexey V. Sobolev,<sup>a</sup> Valeriy Yu. Verchenko,<sup>ab</sup> Alexander A. Tsirlin,<sup>c</sup> Anatoliy Senyshyn,<sup>d</sup> Françoise Damay,<sup>e</sup> Igor A. Presniakov<sup>a</sup> and Andrei V. Shevelkov<sup>a</sup>

<sup>a</sup>*Department of Chemistry, Lomonosov Moscow State University, Moscow 119991, Russia. \*E-mail: khalaniya@inorg.chem.msu.ru*

<sup>b</sup>*National Institute for Chemical Physics and Biophysics, Tallinn 12618, Estonia*

<sup>c</sup>*Experimental Physics VI, Center for Electronic Correlations and Magnetism, Institute of Physics, University of Augsburg, Augsburg 86135, Germany*

<sup>d</sup>*Forschungsneutronenquelle Heinz Maier-Leibnitz (FRM II), Technische Universität München, Garching D-85747, Germany*

<sup>e</sup>*Laboratoire Léon Brillouin, CEA, Centre National de la Recherche Scientifique, CEA-Saclay, Gif-sur-Yvette 91191, France*

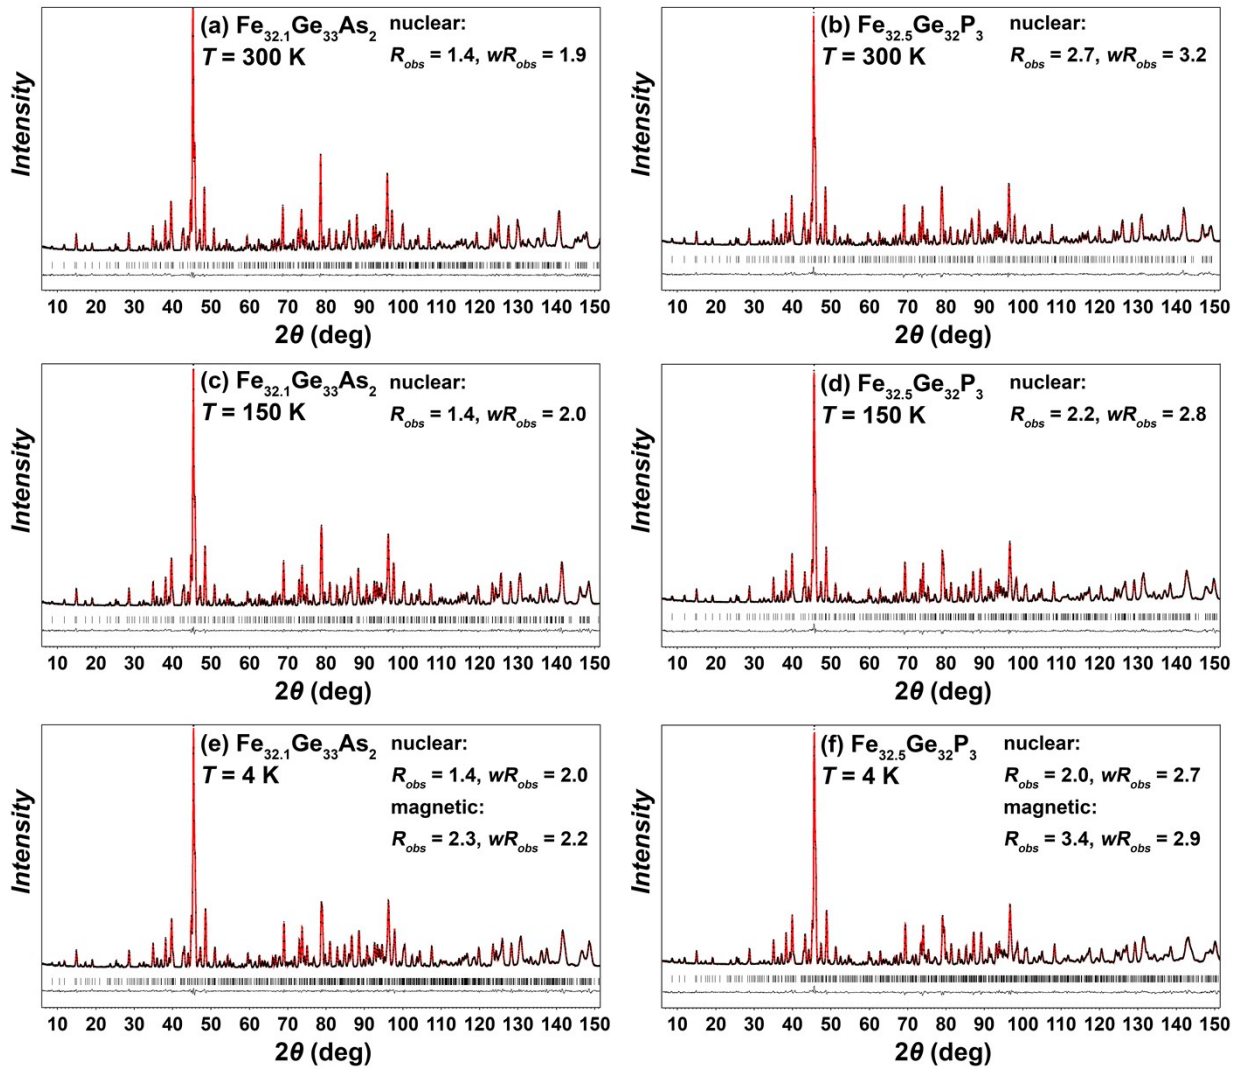

**Fig. S1** Experimental (black points) and calculated (red line) high-resolution neutron powder diffraction patterns of  $\text{Fe}_{32.1}\text{Ge}_{33}\text{As}_2$  (left) and  $\text{Fe}_{32.5}\text{Ge}_{32}\text{P}_3$  (right) recorded on the SPODI diffractometer ( $\lambda = 1.5482 \text{ \AA}$ ). Peak positions (black ticks) and the difference plot (black line) are given in the bottom part of each panel. The panels (a, b) refer to room temperature; (c, d) - to lower temperature above  $T_N$ ; (e, f) - to the low-temperature magnetic structure. Above  $T_N$ , the calculated patterns correspond to crystal structure refinements within the  $P6/mmm$  space group, while the ones below  $T_N$  - to magnetic structure refinements within the  $P_b2_1/m$  magnetic space group.

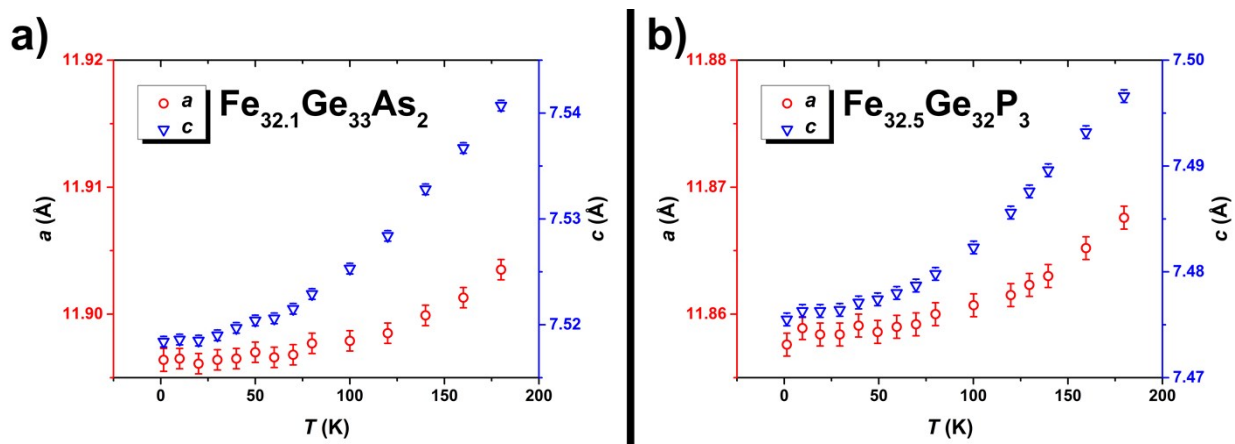

**Fig. S2.** The temperature dependence of the cell parameters from G4.1 neutron diffraction data for  $\text{Fe}_{32.1}\text{Ge}_{33}\text{As}_2$  (a) and  $\text{Fe}_{32.5}\text{Ge}_{32}\text{P}_3$  (b).

**Table S1** Atomic charges estimated by electron density analysis from the DFT calculations.

| Site | Charge |
|------|--------|
| As1  | -0.11  |
| Ge1  | -0.22  |
| Ge2  | -0.17  |
| Ge3  | -0.14  |
| Ge4  | -0.25  |
| Ge5  | -0.06  |
| Fe1  | +0.16  |
| Fe2  | +0.21  |
| Fe3  | +0.18  |
| Fe4  | +0.19  |

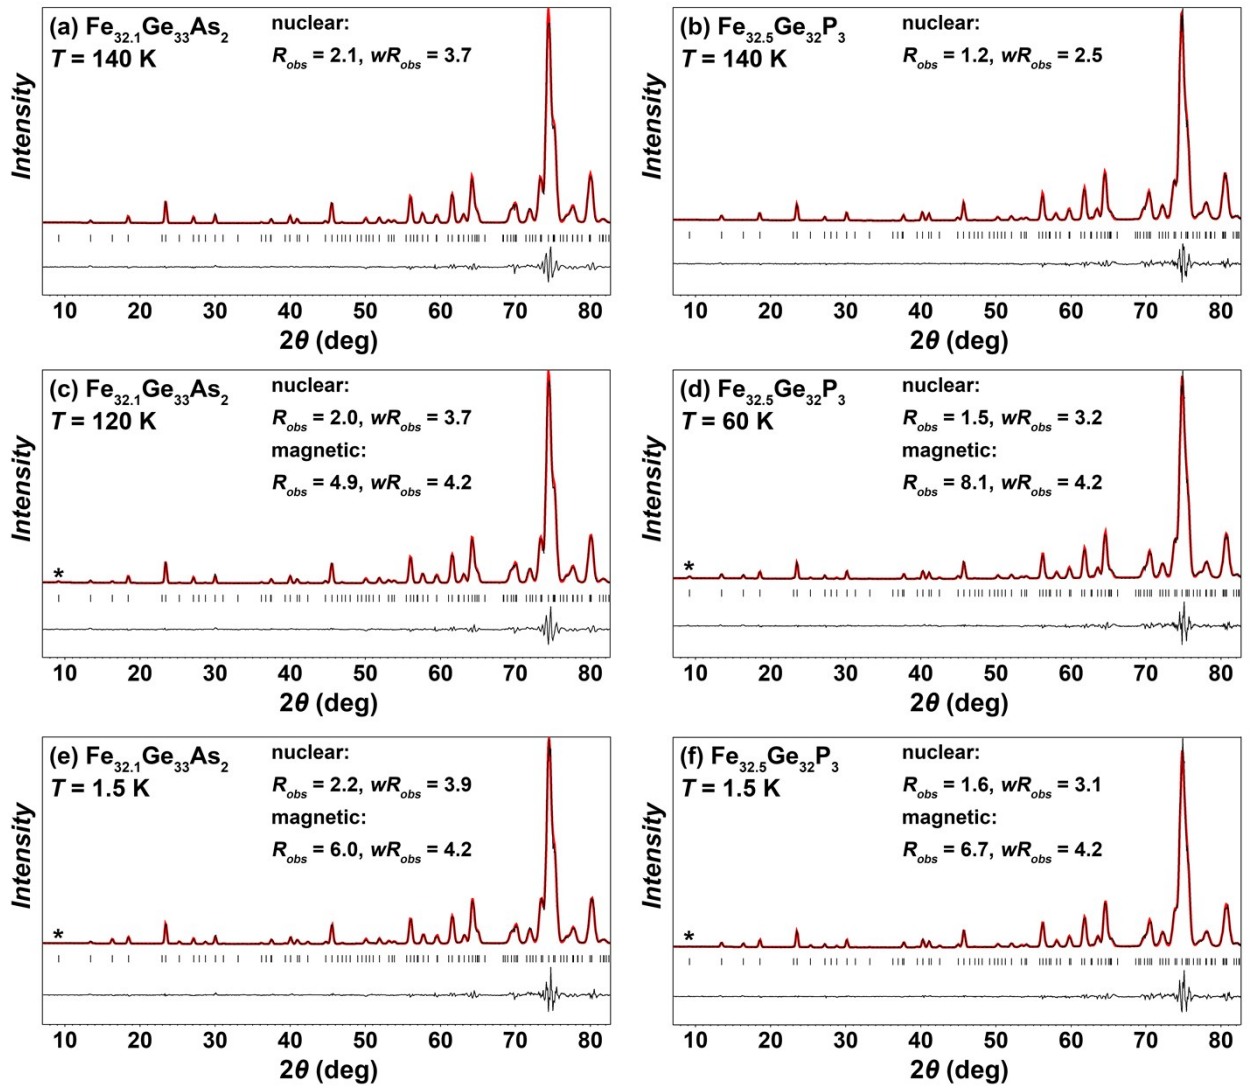

**Fig. S3** Experimental (black points) and calculated (the  $P_b2_1/m$  magnetic space group, red line) low-angle neutron powder diffraction patterns of  $\text{Fe}_{32.1}\text{Ge}_{33}\text{As}_2$  (left) and  $\text{Fe}_{32.5}\text{Ge}_{32}\text{P}_3$  (right) recorded on the G4.1 diffractometer ( $\lambda = 2.423 \text{ \AA}$ ). Peak positions (black ticks) and the difference plot (black line) are given in the bottom part of each panel. The panels (a, b) refer to the paramagnetic state; (c, d) – high-temperature regions, and (e, f) – low-temperature regions. The  $(0; 0; 1/2)$  magnetic peak is marked by the asterisk.
